1 **Title:** Genetic diversity varies with species traits and latitude in predatory soil  
2 arthropods (Myriapoda: Chilopoda)

3

4 **Running title:** Genetic diversity of centipedes

5

6 **Authors:** D. K. Bharti<sup>1\*</sup> (bhartidk@csirccmb.org), Pooja Yashwant Pawar<sup>1</sup>  
7 (poojap837@gmail.com), Gregory D. Edgecombe<sup>2</sup> (g.edgecombe@nhm.ac.uk), Jahnavi  
8 Joshi<sup>1\*</sup> ([jahnavi@csirccmb.org](mailto:jahnavi@csirccmb.org))

9

10 **\*Co-corresponding authors**

11

12 **Institutional affiliations**

13 1. CSIR-Centre for Cellular and Molecular Biology, Uppal Road, Hyderabad, India

14 2. Natural History Museum, London, UK

15 **Abstract**

16

17 **Aim**

18 To investigate the drivers of intra-specific genetic diversity in centipedes, a group of  
19 ancient predatory soil arthropods.

20

21 **Location**

22 Global

23

24 **Time period**

25 Present

26

27 **Major taxa studied**

28 Centipedes (Class: Chilopoda)

29

30 **Methods**

31 We assembled a database of over 1200 mitochondrial cytochrome *c* oxidase subunit I  
32 sequences representing 120 centipede species from all five orders of Chilopoda. We  
33 used this sequence dataset to estimate genetic diversity for centipede species and  
34 compared its distribution with estimates from other arthropod groups. We studied the  
35 variation in centipede genetic diversity with species traits and biogeography using a  
36 beta regression framework, controlling for the effect of shared evolutionary history within  
37 a family.

38

## 39 **Results**

40 We observed a wide variation in genetic diversity across centipede species (0 to  
41 0.1713), which falls towards the higher end of values among arthropods. Overall,  
42 21.51% of the variation in mitochondrial COI genetic diversity in centipedes was  
43 explained by a combination of predictors related to life history and biogeography.  
44 Genetic diversity decreased with body size and latitudinal position of sampled localities,  
45 was greater in species showing maternal care and increased with geographic distance  
46 among conspecifics.

47

## 48 **Main conclusions**

49 Centipedes fall towards the higher end of genetic diversity among arthropods, which  
50 may be related to their long evolutionary history and low dispersal ability. In centipedes,  
51 the negative association of body size with genetic diversity may be mediated by its  
52 influence on local abundance or the influence of ecological strategy on long-term  
53 population history. Species with maternal care had higher genetic diversity, which goes  
54 against our expectations and needs further scrutiny. Hemispheric differences in genetic  
55 diversity can be due to historic climatic stability and lower seasonality in the southern  
56 hemisphere. Overall, we find that despite the differences in mean genetic diversity  
57 among animals, similar processes related to life history strategy and biogeography  
58 shape the variation within them.

59

## 60 **Keywords**

61 biogeography, centipedes, global study, life history, macrogenetics, mitochondrial COI

## 62 **Introduction**

63

64 Intra-specific genetic diversity (henceforth genetic diversity) is the amount of genetic  
65 variation present among individuals of a species and is an important component of  
66 biodiversity. It indicates the evolutionary potential of a species and is correlated with  
67 fitness and species' response to environmental change (DeWoody et al., 2021). Genetic  
68 diversity can also have an influence on higher levels of biological organization by  
69 influencing species diversity, shaping communities (Vellend & Geber, 2005) and  
70 regulating ecosystem functioning (Raffard et al., 2019). Population genetic theory  
71 postulates that neutral genetic diversity increases with effective population size – the  
72 size of an idealized population that loses genetic diversity at the same rate as the  
73 observed population (Kimura, 1983), and mutation rate. A reduction in population size  
74 increases the sampling error in allele frequencies between generations, known as  
75 genetic drift, leading to the loss of genetic diversity (Charlesworth, 2009).

76

77 Previous studies have shown that genetic diversity is influenced by species traits and  
78 biogeography (Leigh et al., 2021). Species traits can modulate long-term effective  
79 population size by determining species' responses to environmental fluctuations. On the  
80 other hand, biogeographic correlates determine the strength of environmental  
81 fluctuations experienced by species, and therefore can influence genetic diversity  
82 (Ellegren & Galtier, 2016). The strength of the relationship between species traits,  
83 biogeography and genetic diversity can be obscured by differences in mutation rates

84 between lineages, which can vary based on the genetic locus under study (Nabholz et  
85 al., 2009).

86

87 Global-scale studies from well-studied taxa show that mitochondrial genetic diversity  
88 decreases with latitude, indicating a relationship between latitude and evolutionary rate  
89 or stability (Gratton et al., 2017, Manel et al., 2020, Miraldo et al., 2016). Global  
90 comparisons of nuclear genetic diversity reveal taxon-specific drivers of genetic  
91 diversity in animals, influenced by life-history strategy, environment, range size and  
92 position (De Kort et al., 2021). Taxon-specific studies show that traits indicative of life  
93 history strategy such as fecundity (Romiguier et al., 2014), reproductive mode (Paz et  
94 al., 2015) and body size (Mackintosh et al., 2019) are better predictors of genome-wide  
95 genetic diversity than census population size. Apart from life history, biogeographic  
96 variables related to range size and latitudinal position have been found to influence  
97 mitochondrial genetic diversity (Fujisawa et al., 2015). Both global-scale and taxon-  
98 specific studies have limited representation of arthropod groups, undersampling the  
99 richness of species traits, evolutionary history and ecosystems they offer. Additionally,  
100 arthropods vary widely in their genetic diversity, having some of the highest values of  
101 genetic diversity among animals (Leffler et al., 2012).

102

103 Among arthropods, the subphylum Myriapoda consisting of millipedes, pauropods,  
104 centipedes and symphylans (Fernández et al., 2018), has not been well-represented in  
105 global studies of genetic diversity, and macroecology studies in general (Beck &  
106 McCain, 2020; Thakur et al., 2020). The class Chilopoda has a 420 million year old

107 evolutionary history and consists of over 3150 described species belonging to five  
108 orders (Edgecombe & Giribet, 2019). Centipedes are important venomous predators of  
109 the soil ecosystem and their taxonomic orders vary in their evolutionary age, diversity of  
110 families and species, and traits related to body size, vision, maternal care, habit  
111 (Edgecombe & Giribet, 2007) and venom composition (Jenner et al., 2019). Molecular  
112 markers, often in combination with morphological characters, have been widely  
113 employed in centipedes to uncover phylogenetic relationships, delimit species, identify  
114 cryptic species (Joshi & Karanth, 2012; Siritwut et al 2018; Wesener et al., 2015, 2016),  
115 and study the evolution of important species traits, such as blindness (Edgecombe et  
116 al., 2019; Vahtera et al., 2012) and maternal care (Fernández et al., 2014).

117

118 The variation in species traits among centipedes can potentially influence genetic  
119 diversity. Centipedes show a striking variation in body size (ranging from a few mm to  
120 up to 300 mm), which can influence genetic diversity by regulating local population  
121 abundance (White et al., 2007). Centipedes are predominantly sexually reproducing and  
122 show variation in their reproductive strategy, which can influence fecundity and long-  
123 term effective population size and thus genetic diversity (Ellegren & Galtier, 2016).  
124 While species from two orders (Scutigermorpha and Lithobiomorpha) lay single eggs,  
125 others (Craterostigmomorpha, Scolopendromorpha and Geophilomorpha) brood  
126 multiple eggs and maternal care is also provided to hatchlings (Bonato & Minelli, 2002;  
127 Fernández et al., 2014). Another species trait that can influence genetic diversity  
128 through its association with habitat specialization or dispersal ability is blindness, seen  
129 in the order Geophilomorpha, in a few species of Lithobiomorpha, and in three families

130 along with a few subterranean species within Scolopendromorpha (Edgecombe et al.,  
131 2019; Vahtera et al., 2012).

132

133 Given their low dispersal ability, the geographic distribution of centipedes is largely  
134 shaped by geological events and species vary widely in their latitudinal range and  
135 biogeographic affiliations (Bonato & Zapparoli, 2011; Edgecombe & Giribet, 2007; Joshi  
136 & Edgecombe, 2019; Joshi & Karanth, 2011; Joshi et al., 2020). In terms of range size,  
137 which may be correlated with abundance and thus genetic diversity, centipedes consist  
138 of island endemics such as *Craterostigma* species (Vélez et al., 2012), narrow-range  
139 continental endemics such as *Ethmostigma agasthyamalaiensis* (Joshi & Edgecombe,  
140 2018) and *Rhysida sada* (Joshi et al., 2019), and species with cosmopolitan  
141 distributions such as *Pachymerium ferrugineum* or pantropical distributions like  
142 *Scolopendra morsitans* (Shelley et al. 2005). Their distribution patterns can be  
143 associated with traits related to reproduction (parthenogenesis in *Lamyctes*  
144 *emarginatus*; Andersson, 2006) or habitat specificity (human commensalism in  
145 *Scutigera coleoptrata*).

146

147 Despite their wide variation in species traits and biogeography, very few studies have  
148 documented genetic diversity and its geographic distribution in centipedes. A  
149 comparative study of two *Cryptops* species from the South Pacific indicated that the  
150 evolutionary age of species, rather than island size or isolation, determines genetic  
151 diversity and population genetic structure (Murienne et al., 2011). A study of an island  
152 endemic from Tasmania, *Craterostigma tasmanianus*, showed the presence of



153 significant population subdivision, which was correlated with geological divisions within  
154 the island (Vélez et al., 2012). Phylogeography of the circum-Mediterranean species  
155 *Scolopendra cingulata* suggests multiple colonization events from Aegean islands to the  
156 mainland since the Last Glacial Maximum, presence of relictual populations, and  
157 genetic differentiation in the mainland associated with geo-tectonic events dated to the  
158 Miocene (Oeyen et al., 2014; Simaiakis et al., 2012). Finally, *Digitipes coonoorensis*  
159 was shown to consist of monophyletic groups with strong population structuring across  
160 a biogeographic barrier in the Western Ghats, India (Joshi & Karanth, 2012).

161

162 There has been an increase in the representation of centipedes in publicly available  
163 sequence data in the last two decades, primarily arising from integrative taxonomic  
164 studies (Edgecombe & Giribet, 2019 and references therein) and regional barcoding  
165 efforts (eg. Spelda et al., 2011; Wesener et al., 2015). Among other genetic markers,  
166 the mitochondrial cytochrome c oxidase subunit I gene (COI), which is widely used as a  
167 DNA barcode, is well-represented across centipede species. The availability of global-  
168 scale publicly available sequence data for centipede species that vary with respect to  
169 their evolutionary age, species traits and biogeography motivated us to study their  
170 relationship with genetic diversity in a comparative framework. In this study, we  
171 specifically ask –

172

173 1. How is genetic diversity distributed across centipede species?

174 We aimed to understand the range of genetic diversity seen in centipedes, an  
175 ancient soil arthropod clade with a 420 million-year evolutionary history, in the

176 context of genetic diversity documented in other well-studied arthropod clades.

177

178 2. What are the species traits and biogeographic variables correlated with  
179 genetic diversity in centipedes?

180 Based on theory, we expect to see a negative relationship between body size,  
181 maternal care (associated with low lifetime fecundity) and blindness (associated  
182 with habitat specificity and dispersal) relative to genetic diversity. These species  
183 traits can reduce effective population size leading to a reduction in genetic  
184 diversity. While latitudinal range is thought to be correlated with population size  
185 and may be positively associated with genetic diversity, the mean latitudinal  
186 position is expected to show the inverse relationship (Figure 1).

187

188 A comprehensive global dataset including species traits, biogeographic correlates and  
189 mitochondrial sequences for 120 centipede species allowed us to estimate genetic  
190 diversity and examine its drivers. We observed a wide variation in genetic diversity  
191 across species, which was high compared to other arthropod classes. Both life history  
192 traits (body size and maternal care) and biogeographic correlates were important in  
193 explaining the variation in mitochondrial COI genetic diversity. This highlights the role of  
194 ecological strategy and latitudinal correlates of environmental stability as possible  
195 drivers of genetic diversity across living organisms, despite the differences in absolute  
196 values of genetic diversity between taxonomic groups.

197

198 **Material and methods**

199

## 200 **DNA sequence data**

201

202 We compiled sequence data from published studies and datasets and extracted  
203 accession numbers for the mitochondrial COI marker across the five centipede orders.  
204 In addition to accession numbers, we also compiled information on museum catalogue  
205 number, collection locality and geographic coordinates from source literature. We  
206 filtered this dataset to only retain those species that had at least three distinct sequence  
207 representatives (Appendix S1 in Supporting Information).

208

## 209 **Georeferencing sequences**

210

211 Among the species that were retained, missing geographic coordinates associated with  
212 accession numbers were obtained by querying voucher numbers against museum  
213 websites (Appendix S1 in Supporting Information). When this was not available, we  
214 used geocoding to obtain geographic coordinates from locality names using the  
215 *geocode\_OSM* function from the package 'tmaptools' (Tennekes, 2018). Average  
216 geographic distance between sequence locations for each species was calculated with  
217 the haversine formula using the function *geodist* function in the package 'geodist'  
218 (Padgham & Sumner, 2021) in R version 3.6.3 (R Core Team, 2021).

219

## 220 **Species traits and biogeographic information**

221

222 Each species was supplemented with trait data from various sources. While the  
223 presence of maternal care and vision show variation at higher taxonomic levels  
224 (Edgecombe & Giribet, 2007), body size information for each species was obtained  
225 largely from species descriptions in taxonomic studies (Appendix S2 in Supporting  
226 Information). Species distribution information was collated from locations corresponding  
227 to species accession numbers, Chilobase 2.0 (Bonato et al., 2016), GBIF (GBIF.org,  
228 2021), species descriptions and regional atlases. These distribution data were used to  
229 derive the latitudinal range for each species (Appendix S2 in Supporting Information).  
230 The mean latitudinal position of each species was calculated using only the geographic  
231 locations corresponding to the sequence dataset. We analysed two versions of the  
232 dataset to factor in native geographic ranges versus synanthropic introductions; one  
233 excludes six species that are likely introductions in parts of their sampled ranges while  
234 the other treats all records as potentially valid. The primary analysis described below  
235 was carried out using the smaller dataset representing the native range of centipede  
236 species.

237

### 238 **Sequence statistics**

239

240 Mitochondrial COI sequences corresponding to the accession numbers were retrieved  
241 from the National Center for Biotechnology Information (NCBI) using the *entrez\_fetch*  
242 function in the package 'rentrez' (Winter, 2017). For each species, sequence alignments  
243 were carried out separately using the MUSCLE algorithm in the package 'muscle'  
244 (Edgar, 2004) under the default parameters. The sequence alignment for each species

245 was visualized in Aliview v1.26 (Larsson, 2014) and sequences were trimmed to bring  
246 them to the same length.

247

248 These edited alignments were used to calculate sequence statistics including sequence  
249 length, number of segregating sites (function *seg.sites* in the package 'ape'; Paradis &  
250 Schliep, 2019), number of parsimony informative sites (function *pis* in the package 'ips';  
251 Heibl, 2008) and nucleotide diversity (function *nuc.div* in the package 'pegas'; Paradis,  
252 2010). Nucleotide diversity is calculated as the per site average number of differences  
253 between a pair of sequences, which is the sum of the number of differences between  
254 sequence pairs divided by the total number of sequence pairs compared. All analysis  
255 was carried out in R 3.6.1 (R Core Team, 2021).

256

## 257 **Statistical analysis**

258

259 Genetic diversity is a proportion that estimates the probability of observing a mutation at  
260 a given site within a DNA sequence and can theoretically range from 0 to 1. However,  
261 intra-specific genetic diversity ranges closer to 0, as it is calculated from closely related  
262 individuals belonging to a single species. Our estimate of genetic diversity, average  
263 pairwise difference, is calculated by counting the number of mutations along a  
264 sequence that is hundreds of base pairs long. Given that genetic diversity is a  
265 proportion calculated using a large number of total counts (sequence length), it  
266 resembles continuous proportions, which can be analyzed using a beta regression  
267 framework (Douma & Weedon, 2019).

268

269 The error distribution of our regression model, the beta distribution, belongs to the  
270 exponential family and is defined by two parameters – mean and precision. In the  
271 deterministic part of our model, our response variable of genetic diversity is predicted by  
272 species traits (body size – continuous; blindness and maternal care – binary) and  
273 biogeography (latitudinal range, mean latitude and geographic distance – continuous).  
274 Since some of our genetic diversity estimates took zero values, which cannot be  
275 modelled using the beta regression algorithm, we replaced these with a small value  
276 following standard recommendations (Smithson & Verkuilen, 2006). All the predictor  
277 variables were standardized to have a mean of zero and standard deviation of 1. We  
278 used a logit-link function for the linear transformation of our exponential-family model.  
279 Our global model consisted of all the predictors mentioned above, where the precision  
280 parameter of the error distribution was independently modelled using sample size (the  
281 number of sequences representing each species), and taxonomic family was used as a  
282 random effect to account for the influence of shared evolutionary history on genetic  
283 diversity. Nested models created by dropping the precision parameter and/or the  
284 random effect were compared using their AIC values to choose the best model. We  
285 calculated a variation inflation factor for each predictor to check the influence of multi-  
286 collinearity between these variables on the coefficient estimates. We additionally  
287 measured the phylogenetic signal in model residuals using a family-level phylogenetic  
288 tree (Fernández et al., 2016) by calculating Pagel's  $\lambda$  (Pagel, 1999). The  
289 scolopendromorph family Mimopidae represented by a single species *Mimops orientalis*  
290 was not represented in the phylogenetic tree and hence not included in calculating the

291 phylogenetic signal.

292

293 The beta regression models were run using the *glmmTMB* function in the package

294 'glmmTMB' (Brooks et al., 2017) and the *betareg* function in the package 'betareg'

295 (Cribari-Neto & Zeileis, 2010), and phylogenetic signal in model residuals was

296 calculated using the *phylosig* function in the 'phytools' package (Revell, 2012) in R 3.6.1

297 (R Core Team, 2021)

298

299

## 300 **Results**

301

### 302 **Geographic and taxonomic distribution of data**

303

304 The complete dataset representing 46 published datasets with georeferenced

305 sequences along with information on species trait and biogeography consisted of 1218

306 mitochondrial COI sequences representing 120 unique species, 12 of 18 centipede

307 families and all five orders of Chilopoda. The species in our dataset varied in body size

308 by two orders of magnitude (mean = 50 mm, range = 8.5 to 250 mm), with a relatively

309 balanced distribution of reproductive strategy (78 of 120 species showing maternal

310 care) and a predominance of species with the presence of vision (96 of 120 species).

311 On average, each species was represented by 10 unique sequences (range = 3 to 68),

312 with a mean alignment length of 653 bp (range = 465 to 840 bp). The centipede orders

313 varied in the number of species and the total number of sequences representing them.  
314 These sequences arose from an average of eight unique geographic locations for each  
315 species (range = 1 to 53), separated by geographic distances up to 5066 km (Appendix  
316 S3 in Supporting Information).

317

318 Overall, the sequences in the dataset were obtained from 762 unique geographic  
319 locations spanning over 100 degrees in latitude (46.9°S to 60.5°N), with centipede  
320 orders showing distinct patterns of geographic distribution (Figure 2). For the two most  
321 well-represented orders, Scolopendromorpha sequences mostly originated from tropical  
322 and sub-tropical regions (mean latitude = 18.16°N), while Lithobiomorpha sequences  
323 were predominantly from northern temperate regions (mean latitude = 45.57°N). There  
324 were a larger number of sequences from the northern (n = 1042) as compared to the  
325 southern hemisphere (n = 176), with longitudinal under-representation from the  
326 Americas and Africa (Figure 2). These geographic gaps may arise from an interaction of  
327 differences in patterns of species distribution along with sequencing effort and taxon  
328 sampling.

329

### 330 **Genetic diversity in centipedes compared to other arthropods**

331

332 The average genetic diversity for centipedes was 0.0747 (range = 0 to 0.1713), with its  
333 distribution falling towards the higher end of values as compared to other arthropod  
334 groups (Figure 3). The average values of genetic diversity for other arthropod classes  
335 ranged from 0.0098 in insects to 0.0445 in millipedes, the latter belonging to the same



336 sub-phylum as centipedes, Myriapoda. Though not an exhaustive effort, our collation of  
337 genetic diversity values from other arthropod groups showed evidence for an increased  
338 representation in insects in comparison to other taxonomic classes (Figure 3; Appendix  
339 S4 in Supporting Information).

340

#### 341 **Variation in genetic diversity is related to life history traits and mean latitude**

342

343 Among the four models compared, the one using predictors for the fixed effects along  
344 with an independent predictor for precision emerged as the best model given its lowest  
345 AIC score (Table 1). This model explained 21.51% of the variation in genetic diversity  
346 across species and was selected over the global model, which used taxonomic family  
347 as a random effect. The variation inflation factors associated with the predictor variables  
348 were lower than 5, indicating that there was no significant influence of predictor multi-  
349 collinearity on coefficient estimates. Life history traits – body size and maternal care –  
350 significantly contributed to explaining this variation, while average geographic distance  
351 and the mean latitude of sequences were the biogeographic variables that emerged as  
352 significant (Table 1). The phylogenetic signal in the model residuals was close to zero  
353 and not significant ( $\lambda = 6.61 \times 10^{-5}$ ,  $p = 1$ ), indicating that the unexplained variation in  
354 genetic diversity could not be explained by a Brownian motion model of trait evolution at  
355 the family level.

356

357

358 Genetic diversity showed a negative relationship with body size and mean latitude

359 (Figure 4), where smaller species or those with sequences from lower latitudes had  
360 greater values of genetic diversity (Figure 5). Species with maternal care had higher  
361 values of genetic diversity, though it was associated with wide confidence intervals  
362 indicating substantial variation within each class (Figure 4, 5). Genetic diversity  
363 increased with greater average geographic distance between sequences, but the  
364 coefficient and its confidence interval were small in magnitude and close to zero.  
365 Confidence intervals of coefficients for vision and species latitudinal range overlapped  
366 with zero, indicating that they were relatively less important in explaining the variation in  
367 genetic diversity between centipede species (Figure 4).

368

369 In the analysis carried out using the dataset including likely synanthropic introductions,  
370 vision showed a significant positive relationship with genetic diversity, along with body  
371 size and maternal care. Values of average geographic distance showed a large  
372 variation between the two datasets and it was not a significant predictor when likely  
373 introductions were retained (Appendix S5 in Supporting Information).

374

## 375 **Discussion**

376

### 377 **Centipedes have relatively high genetic diversity among arthropods**

378

379 We find that centipedes have a high genetic diversity in comparison to other arthropod  
380 groups, which themselves fall in the higher end of the spectrum as compared to plants  
381 and chordates (Leffler et al., 2012). Among arthropods, where observations are skewed

382 towards insects, high genetic diversity is hypothesized to be driven by their ability to  
383 reach large population sizes (Leffler et al., 2012). However, this mechanism may not  
384 hold true for centipedes, which are predatory arthropods that occur in low population  
385 densities in the soil ecosystem. The observed range of genetic diversity in centipedes  
386 may be explained by their persistence over a prolonged evolutionary history  
387 ('evolutionary framework' in Lawrence & Fraser, 2020) that extends back 420 million  
388 years (Edgecombe & Giribet, 2019). The limited dispersal ability of centipedes can also  
389 contribute to strong spatial differences in genetic composition reported in soil arthropod  
390 communities (Arribas et al., 2021) and the presence of geographically unique genetic  
391 diversity (Gloss et al, 2016). The positive relationship between geographic distance and  
392 genetic diversity seen in centipedes supports such a distance decay in genetic  
393 similarity. Additionally, it is possible that the presence of cryptic diversity may contribute  
394 to the relatively high values of genetic diversity observed for some species, which needs  
395 to be further examined with species delimitation methods using genome-level data.

396

### 397 **Species traits are significant correlates of genetic diversity**

398

399 Despite the differences in the absolute values of genetic diversity across taxonomic  
400 groups, we find an overlap in the causal processes driving variation in genetic diversity.  
401 The genetic diversity of centipedes decreases with increasing body size, a relationship  
402 that has been observed across several animal groups (Brüniche-Olsen et al., 2021; De  
403 Kort et al., 2021; Mackintosh et al., 2019; Romiguier et al., 2014; an exception being  
404 Barrow et al., 2021). This association could be driven by the negative relationship

405 between body size and abundance due to resource constraints (White et al., 2007), and  
406 by body size representing an ecological strategy that determines long-term effective  
407 population size (Ellegren & Galtier, 2016). Species with small body size, high fecundity  
408 and a short lifespan are hypothesized to recover from bottlenecks driven by  
409 environmental fluctuations more easily, therefore maintaining a larger long-term  
410 effective population size and greater genetic diversity (Ellegren & Galtier, 2016;  
411 Romiguier et al., 2014).

412

413 However, we find that centipede species showing maternal care of offspring had higher  
414 values of genetic diversity as compared to those that abandon their eggs. This  
415 questions our assumption of maternal care translating to greater investment in offspring  
416 quality over quantity, and therefore, lower lifetime fecundity and genetic diversity. There  
417 is a dearth of information on breeding biology from orders lacking maternal care, with  
418 substantial variation in the number of eggs reported for a few species (Lewis, 1981),  
419 and very little information on their survivorship. Gathering more natural history  
420 information would clarify the relationship between maternal care and lifetime fecundity in  
421 centipedes, and the observed positive relationship with genetic diversity.

422

423 The effect of blindness on genetic diversity may be mediated through its association  
424 with specialization to a subterranean habitat and/or low dispersal ability. We find that  
425 vision only emerges as a significant positive correlate of genetic diversity when  
426 synanthropic introductions are included, indicating sensitivity to changes in input data.  
427 While the observed pattern aligns with a negative association between specialization

428 and genetic diversity seen in amphibians (De Kort et al., 2021), parasitoid wasps  
429 (Bunnefeld et al., 2018) and bumble bees (Jackson et al., 2018), other studies show no  
430 relationship in butterflies (Mackintosh et al., 2019), forest carabid beetles (Brouat et al.,  
431 2004) and bees (Dellicour et al., 2015). A more balanced representation of species with  
432 and without vision (e.g. more Geophilomorpha) using an expanded dataset could help  
433 resolve this relationship in centipedes.

434

### 435 **Latitudinal gradient and hemispheric differences in genetic diversity**

436

437 Apart from species traits, several recent studies document a decline in genetic diversity  
438 with increasing latitude (beetles – Fujisawa et al., 2015; amphibians – Gratton et al.,  
439 2017; Miraldo et al., 2016; mammals – Millette et al., 2019; Theodoridis et al., 2020;  
440 salamanders – Barrow et al., 2021; amphibians and molluscs – De Kort et al., 2021),  
441 mirroring the latitudinal gradient in species diversity (Mittelbach et al., 2007). The  
442 mechanisms shaping latitudinal patterns in genetic diversity are thought to be congruent  
443 with those driving species diversity, related to climatic stability, longer evolutionary  
444 history, larger area with higher productivity and higher temperature resulting in high  
445 rates of molecular evolution at low latitudes (Fine et al., 2015). In centipedes, we find  
446 that genetic diversity increases from the northern hemisphere towards the tropics and  
447 the southern hemisphere. The hemispheric differences in genetic diversity of centipedes  
448 are indicative of similar patterns in species diversity (Dunn et al., 2009), which may be  
449 driven by differences in the current range of environmental variables and historic  
450 climatic stability (Chown et al., 2004). However, the wide confidence intervals for the

451 southern hemisphere and limited representation of data points do not allow us to  
452 comment on a trend in comparison with the tropics.

453

454 Other arthropod groups have been reported to show deviations from the commonly  
455 observed latitudinal gradient in genetic diversity. Insects show a bimodal latitudinal  
456 distribution of genetic diversity, which may be related to the tropics having more  
457 specialized species with narrow niches and smaller ranges. On the other hand, the  
458 prevalence of diapause in the mid-latitudes may promote greater population persistence  
459 and genetic diversity in this region (French et al., 2022).

460

461 **What can intra-specific genetic diversity tell us about species diversity?**

462

463 Variation in genetic diversity can be indicative of broader patterns in species diversity,  
464 either through the same underlying mechanisms acting independently or because of a  
465 cause-and-effect relationship between the two. As mentioned earlier, area, time,  
466 environmental factors and climatic stability can influence intra-specific and species  
467 diversity in parallel. Genetic diversity can positively influence species diversity if it  
468 reflects population fitness and reduces extinction rates or increases the diversity of  
469 competing species. High species diversity can negatively influence genetic diversity if  
470 species packing leads to niche specialization and if limiting resources result in smaller  
471 population sizes per species (Vellend & Geber, 2005).

472

473 In an empirical evaluation, neutral mechanisms involving area and isolation were found

474 to be associated with both species and genetic diversity in beetles within an island  
475 system, shaping community and haplotype similarity along with dispersal ability  
476 (Papadopoulou et al., 2011). A strong relationship between genetic diversity and  
477 phylogenetic diversity was also observed in a global study of mammals, where it was  
478 speculated that microevolution at the population level may drive patterns in species  
479 diversity through various mechanisms (Theodoridis et al., 2020). However, the  
480 relationship between species and genetic diversity may be decoupled due to biological  
481 differences between taxa, lack of correlation between range size and genetic diversity  
482 (as opposed to a strong relationship between range size and species diversity) and  
483 sampling biases at the population-level (Lawrence & Fraser, 2020). It remains to be  
484 seen if these two hierarchical levels of biodiversity are correlated in centipedes, and if  
485 there is a causal link between genetic diversity as a species trait and diversification  
486 rates among various centipede groups.

487

#### 488 **Significant variation in genetic diversity using a mitochondrial marker**

489

490 As explained above, we find substantial variation in mitochondrial genetic diversity in  
491 centipedes, which is correlated with species traits, geographic distance and latitudinal  
492 distribution. This is in contrast with some previous studies, which find very limited  
493 variation in mitochondrial as compared to nuclear estimates (Bazin et al., 2006;  
494 Mackintosh et al., 2019) and no correlation with species life history traits (Dapporto et  
495 al., 2019). Estimates of genetic diversity can vary based on the properties of the genetic  
496 marker – mode of inheritance, ploidy (Berlin et al., 2007), length of the genetic map

497 (Mackintosh et al., 2019) and mutation rate variation among taxa (Nabholz et al., 2009).  
498 The limited variation in mitochondrial genetic diversity and its lack of correlation with  
499 effective population size is ascribed to repeated selective sweeps and loss of diversity  
500 through genetic draft, given its maternal inheritance and smaller genome (Gillespie,  
501 2001). For these reasons, the use of mitochondrial markers has been criticised despite  
502 the wide availability of sequences arising from barcoding efforts (Paz-Vinas et al.,  
503 2021).

504

505 In this context, it is interesting that we find significant variation in diversity estimates  
506 across centipede species, which is associated with species traits. The existence of this  
507 variation could be due to the smaller population sizes of predatory arthropods, which  
508 can dampen the frequency of selective sweeps as beneficial mutations are lost to  
509 genetic drift (Piganeonau & Eyre-Walker, 2009). The strength of selection also depends  
510 on the nature and spatial structure of genetic variation, which shapes genetic diversity  
511 (Leffler et al., 2012).

512

513 While the predictors in this study explain over a fifth of variation in genetic diversity, the  
514 strength of the observed correlation is congruent with other studies at a similar scale  
515 (Leigh et al., 2021). The reduced explanatory power could be due to spatial and  
516 temporal variation in drivers and population histories that cancel out at a broad spatial  
517 and taxonomic scale, the potential importance of environmental variables that are  
518 absent from the analysis, or the choice of the genetic marker as detailed above.

519



## 520 **Taxonomic and geographic gaps in sequencing efforts**

521

522 Apart from revealing potential drivers of variation in genetic diversity, our dataset  
523 revealed taxonomic and distributional gaps in sequencing effort. There is a dearth of  
524 sufficient sequence information from the Americas and Africa, leading to a longitudinal  
525 bias in the available data (Figure 2). This also adds to a latitudinal gap in sampling, as  
526 most sequence data in the southern hemisphere are from Australia and New Zealand  
527 (Figure 2). There is also a sampling bias in the Palearctic, where most available  
528 sequences are from Europe (Figure 2).

529

530 The existing sequence information used in our analysis represents about 4% of existing  
531 species diversity and 12 of the 18 centipede families. Among the five centipede orders,  
532 the sampling gap in terms of species and family representation is the starkest for  
533 Geophilomorpha, where we have sampled 12 of over 1300 species (Appendix S3 in  
534 Supporting Information, Edgecombe & Giribet, 2007). This group is unique in terms of  
535 its habitat, being obligate soil-dwellers, as well as its feeding behaviour.  
536 Geophilomorphs feed using a greater degree of liquid suction than other centipedes,  
537 and use their mandibles to sweep or rasp food instead of chewing, which may  
538 potentially influence their prey resource base and population dynamics (Lewis, 1981).  
539 These geographic and taxonomic gaps can be the focus of future sampling efforts to  
540 reassess the current results and would also contribute to centipede phylogenetics and  
541 biogeography.

542

543 **Significance of examining intraspecific genetic diversity among divergent taxa**

544

545 Our study generates hypotheses of drivers of genetic diversity in a relatively under-  
546 studied taxonomic group with a deep evolutionary history. These can be tested for their  
547 generality by using controlled comparisons of species with contrasting traits and  
548 distribution patterns and by screening additional nuclear markers. The generation of  
549 such hypotheses and efforts to test their validity provide means of understanding the  
550 generality of macroecological patterns across under-studied taxonomic groups (Beck &  
551 McCain, 2020) from unique and poorly explored habitats showing high biotic and abiotic  
552 variability (Thakur et al., 2020). While large-scale biogeographic studies in centipedes  
553 can be challenging due to a 'species identification bottleneck' reported in other  
554 arthropods (French et al., 2022), our study can act as a stepping-stone for future work.  
555 It also generates hypotheses for landscape-level studies exploring environmental and  
556 historical drivers of genetic diversity, and its relationship with population genetic  
557 structure (Salinas-Ivanenko & Múrria, 2021) and phylogenetic diversity (Bharti et al.,  
558 2021).

559 **References**

560

561 Andersson, G. (2006). Habitat preferences and seasonal distribution of developmental  
562 stadia in *Lamyctes emarginatus* (Newport, 1844) (*L. fulvicornis* Meinert, 1868) and  
563 comparisons with some *Lithobius* species (Chilopoda, Lithobiomorpha). Norwegian  
564 Journal of Entomology, 53, 311–320.

565 Arribas, P., Andújar, C., Salces Castellano, A., Emerson, B. C., & Vogler, A. P. (2021).  
566 The limited spatial scale of dispersal in soil arthropods revealed with whole-community  
567 haplotype-level metabarcoding. *Molecular Ecology*, 30(1), 48–61.

568 <https://doi.org/10.1111/mec.15591>

569 Barrow, L. N., Masiero da Fonseca, E., Thompson, C. E. P., & Carstens, B. C. (2021).  
570 Predicting amphibian intraspecific diversity with machine learning: Challenges and  
571 prospects for integrating traits, geography, and genetic data. *Molecular Ecology*  
572 *Resources*, 21(8), 2818–2831. <https://doi.org/10.1111/1755-0998.13303>

573 Bazin, E., Glémin, S., & Galtier, N. (2006). Population size does not influence  
574 mitochondrial genetic diversity in animals. *Science*, 312(5773), 570–572.

575 <https://doi.org/10.1126/science.1122033>

576 Berlin, S., Tomaras, D., & Charlesworth, B. (2007). Low mitochondrial variability in birds  
577 may indicate Hill-Robertson effects on the W chromosome. *Heredity*, 99(4), 389–396.

578 <https://doi.org/10.1038/sj.hdy.6801014>

579 Beck, J., & McCain, C. M. (2020). Just bird food? – On the value of invertebrate  
580 macroecology. *Frontiers of Biogeography*, 12(3). <https://doi.org/10.21425/F5FBG47684>

581 Blanchet, S., Prunier, J. G., & De Kort, H. (2017). Time to go bigger: emerging patterns

582 in macrogenetics. *Trends in Genetics: TIG*, 33(9), 579–580.  
583 <https://doi.org/10.1016/j.tig.2017.06.007>

584 Bonato, L., Chagas-Jr, A., Edgecombe, G., Lewis, J., Minelli, A., Pereira, L., Shelley, R.,  
585 Stoev, P., & Zapparoli, M. (2016). ChiloBase 2.0—A World Catalogue of Centipedes  
586 (Chilopoda).

587 Bonato, L., & Minelli, A. (2002). Parental care in *Dicellyphilus carniolensis* (C. L. Koch,  
588 1847): New behavioural evidence with implications for the higher phylogeny of  
589 centipedes (Chilopoda). *Zoologischer Anzeiger - A Journal of Comparative Zoology*,  
590 241(3), 193–198. <https://doi.org/10.1078/0044-5231-00069>

591 Bonato, L., & Zapparoli, M. (2011). Chilopoda – Geographical distribution. In *Treatise on*  
592 *Zoology—Anatomy, Taxonomy, Biology. The Myriapoda* (Vol. 1, pp. 327–337). Brill  
593 publishers.

594 Brooks, M. E., Kristensen, K., Benthem, K. J. van, Magnusson, A., Berg, C. W., Nielsen,  
595 A., Skaug, H. J., Mächler, M., & Bolker, B. M. (2017). glmmTMB balances speed and  
596 flexibility among packages for zero-inflated generalized linear mixed modeling. *The R*  
597 *Journal*, 9(2), 378–400.

598 Brouat, C., Chevallier, H., Meusnier, T., Noblecourt, T., & Rasplus, Y. (2004).  
599 Specialization and habitat: Spatial and environmental effects on abundance and genetic  
600 diversity of forest generalist and specialist *Carabus* species. *Molecular Ecology*, 13,  
601 1815–1826. <https://doi.org/10.1111/j.1365-294X.2004.02206.x>

602 Brüniche-Olsen, A., Kellner, K. F., Belant, J. L., & DeWoody, J. A. (2021). Life-history  
603 traits and habitat availability shape genomic diversity in birds: Implications for  
604 conservation. *Proceedings of the Royal Society B: Biological Sciences*, 288(1961),

605 20211441. <https://doi.org/10.1098/rspb.2021.1441>

606 Bunnfeld, L., Hearn, J., Stone, G. N., & Lohse, K. (2018). Whole-genome data reveal  
607 the complex history of a diverse ecological community. *Proceedings of the National*  
608 *Academy of Sciences*, 115(28), E6507–E6515.  
609 <https://doi.org/10.1073/pnas.1800334115>

610 Charlesworth, B. (2009). Effective population size and patterns of molecular evolution  
611 and variation. *Nature Reviews Genetics*, 10(3), 195–205.  
612 <https://doi.org/10.1038/nrg2526>

613 Chown, S. L., Sinclair, B. J., Leinaas, H. P., & Gaston, K. J. (2004). Hemispheric  
614 asymmetries in biodiversity—A serious matter for ecology. *PLOS Biology*, 2(11), e406.  
615 <https://doi.org/10.1371/journal.pbio.0020406>

616 Cribari-Neto, F., & Zeileis, A. (2010). Beta regression in R. *Journal of Statistical*  
617 *Software*, 34, 1–24. <https://doi.org/10.18637/jss.v034.i02>

618 Dapporto, L., Cini, A., Vodă, R., Dincă, V., Wiemers, M., Menchetti, M., Magini, G.,  
619 Talavera, G., Shreeve, T., Bonelli, S., Casacci, L. P., Balletto, E., Scalercio, S., & Vila,  
620 R. (2019). Integrating three comprehensive data sets shows that mitochondrial DNA  
621 variation is linked to species traits and paleogeographic events in European butterflies.  
622 *Molecular Ecology Resources*, 19(6), 1623–1636. [https://doi.org/10.1111/1755-](https://doi.org/10.1111/1755-0998.13059)  
623 [0998.13059](https://doi.org/10.1111/1755-0998.13059)

624 De Kort, H., Prunier, J. G., Ducatez, S., Honnay, O., Baguette, M., Stevens, V. M., &  
625 Blanchet, S. (2021). Life history, climate and biogeography interactively affect worldwide  
626 genetic diversity of plant and animal populations. *Nature Communications*, 12(1), 516.  
627 <https://doi.org/10.1038/s41467-021-20958-2>

628 Dellicour, S., Michez, D., Rasplus, J.-Y., & Mardulyn, P. (2015). Impact of past climatic  
629 changes and resource availability on the population demography of three food-specialist  
630 bees. *Molecular Ecology*, 24, 1074–1090. <https://doi.org/10.1111/mec.13085>

631 DeWoody, J. A., Harder, A. M., Mathur, S., & Willoughby, J. R. (2021). The long-  
632 standing significance of genetic diversity in conservation. *Molecular Ecology*, 30(17),  
633 4147–4154. <https://doi.org/10.1111/mec.16051>

634 Dunn, R. R., Agosti, D., Andersen, A. N., Arnan, X., Bruhl, C. A., Cerdá, X., Ellison, A.  
635 M., Fisher, B. L., Fitzpatrick, M. C., Gibb, H., Gotelli, N. J., Gove, A. D., Guenard, B.,  
636 Janda, M., Kaspari, M., Laurent, E. J., Lessard, J.-P., Longino, J. T., Majer, J. D., ...  
637 Sanders, N. J. (2009). Climatic drivers of hemispheric asymmetry in global patterns of  
638 ant species richness. *Ecology Letters*, 12(4), 324–333. [https://doi.org/10.1111/j.1461-](https://doi.org/10.1111/j.1461-0248.2009.01291.x)  
639 [0248.2009.01291.x](https://doi.org/10.1111/j.1461-0248.2009.01291.x)

640 Douma, J. C., & Weedon, J. T. (2019). Analysing continuous proportions in ecology and  
641 evolution: A practical introduction to beta and Dirichlet regression. *Methods in Ecology*  
642 *and Evolution*, 10(9), 1412–1430. <https://doi.org/10.1111/2041-210X.13234>

643 Edgar, R. C. (2004). MUSCLE: Multiple sequence alignment with high accuracy and  
644 high throughput. *Nucleic Acids Research*, 32(5), 1792–1797.  
645 <https://doi.org/10.1093/nar/gkh340>

646 Edgecombe, G. D., & Giribet, G. (2007). Evolutionary biology of centipedes (Myriapoda:  
647 Chilopoda). *Annual Review of Entomology*, 52, 151–170.  
648 <https://doi.org/10.1146/annurev.ento.52.110405.091326>

649 Edgecombe, G. D., & Giribet, G. (2019). The molecularization of centipede systematics.  
650 In G. Fusco (Ed.), *Perspectives on evolutionary and developmental biology: Essays for*

651 Alessandro Minelli (pp. 167– 178). Padova University Press.

652 Edgecombe, G. D., Huey, J. A., Humphreys, W. F., Hillyer, M., Burger, M. A.,  
653 Volschenk, E. S., & Waldock, J. M. (2019). Blind scolopendrid centipedes of the genus  
654 *Cormocephalus* from subterranean habitats in Western Australia (Myriapoda:  
655 Scolopendromorpha: Scolopendridae). *Invertebrate Systematics*, 33(6), 807–824.  
656 <https://doi.org/10.1071/IS19015>

657 Ellegren, H., & Galtier, N. (2016). Determinants of genetic diversity. *Nature Reviews*  
658 *Genetics*, 17(7), 422–433. <https://doi.org/10.1038/nrg.2016.58>

659 Fernández, R., Edgecombe, G. D., & Giribet, G. (2018). Phylogenomics illuminates the  
660 backbone of the Myriapoda Tree of Life and reconciles morphological and molecular  
661 phylogenies. *Scientific Reports*, 8(1), 83. <https://doi.org/10.1038/s41598-017-18562-w>

662 Fernández, R., Laumer, C. E., Vahtera, V., Libro, S., Kaluziak, S., Sharma, P. P.,  
663 Pérez-Porro, A. R., Edgecombe, G. D., & Giribet, G. (2014). Evaluating topological  
664 conflict in centipede phylogeny using transcriptomic data sets. *Molecular Biology and*  
665 *Evolution*, 31(6), 1500–1513. <https://doi.org/10.1093/molbev/msu108>

666 Fine, P. V. A. (2015). Ecological and evolutionary drivers of geographic variation in  
667 species diversity. *Annual Review of Ecology, Evolution, and Systematics*, 46(1), 369–  
668 392. <https://doi.org/10.1146/annurev-ecolsys-112414-054102>

669 French, C. M., Bertola, L. D., Carnaval, A. C., Economo, E. P., Kass, J. M., Lohman, D.  
670 J., Marske, K. A., Meier, R., Overcast, I., Rominger, A. J., Staniczenko, P., & Hickerson,  
671 M. J. (2022). Global determinants of the distribution of insect genetic diversity (p.  
672 2022.02.09.479762). *bioRxiv*. <https://doi.org/10.1101/2022.02.09.479762>

673 Fujisawa, T., Vogler, A. P., & Barraclough, T. G. (2015). Ecology has contrasting effects

674 on genetic variation within species versus rates of molecular evolution across species in  
675 water beetles. *Proceedings of the Royal Society B: Biological Sciences*, 282(1799),  
676 20142476. <https://doi.org/10.1098/rspb.2014.2476>

677 GBIF.org (2021), GBIF Home Page. Available from: <https://www.gbif.org>

678 Gillespie, J. H. (2001). Is the population size of a species relevant to its evolution?  
679 *Evolution*, 55(11), 2161–2169. <https://doi.org/10.1111/j.0014-3820.2001.tb00732.x>

680 Gloss, A. D., Groen, S. C., & Whiteman, N. K. (2016). A genomic perspective on the  
681 generation and maintenance of genetic diversity in herbivorous insects. *Annual Review*  
682 *of Ecology, Evolution, and Systematics*, 47(1), 165–187.  
683 <https://doi.org/10.1146/annurev-ecolsys-121415-032220>

684 Gratton, P., Marta, S., Bocksberger, G., Winter, M., Keil, P., Trucchi, E., & Köhl, H.  
685 (2017). Which latitudinal gradients for genetic diversity? *Trends in Ecology & Evolution*,  
686 32(10), 724–726. <https://doi.org/10.1016/j.tree.2017.07.007>

687 Heibl, C. (2008 onwards). PHYLOCH: R language tree plotting tools and interfaces to  
688 diverse phylogenetic software packages. <http://www.christophheibl.de/Rpackages.html>.

689 Jackson, J. M., Pimsler, M. L., Oyen, K. J., Koch-Uhuad, J. B., Herndon, J. D., Strange,  
690 J. P., Dillon, M. E., & Lozier, J. D. (2018). Distance, elevation and environment as  
691 drivers of diversity and divergence in bumble bees across latitude and altitude.  
692 *Molecular Ecology*, 27(14), 2926–2942. <https://doi.org/10.1111/mec.14735>

693 Jenner, R. A., von Reumont, B. M., Campbell, L. I., & Undheim, E. A. B. (2019). Parallel  
694 evolution of complex centipede venoms revealed by comparative proteotranscriptomic  
695 analyses. *Molecular Biology and Evolution*, 36(12), 2748–2763.  
696 <https://doi.org/10.1093/molbev/msz181>



697 Joshi, J., & Edgecombe, G. D. (2018). Molecular phylogeny and systematics of the  
698 centipede genus *Ethmostigmus* Pocock (Chilopoda: Scolopendromorpha) from  
699 peninsular India. *Invertebrate Systematics*, 32(6), 1316–1335.  
700 <https://doi.org/10.1071/IS18030>

701 Joshi, J., & Edgecombe, G. D. (2019). Evolutionary biogeography of the centipede  
702 genus *Ethmostigmus* from peninsular India: Testing an ancient vicariance hypothesis for  
703 Old World tropical diversity. *BMC Evolutionary Biology*, 19(1), 41.  
704 <https://doi.org/10.1186/s12862-019-1367-6>

705 Joshi, J., & Karanth, K. P. (2011). Cretaceous-Tertiary diversification among select  
706 Scolopendrid centipedes of South India. *Molecular Phylogenetics and Evolution*, 60(3),  
707 287–294. <https://doi.org/10.1016/j.ympev.2011.04.024>

708 Joshi, J., & Karanth, K. P. (2012). Coalescent method in conjunction with niche  
709 modeling reveals cryptic diversity among centipedes in the Western Ghats of South  
710 India. *PLoS ONE*, 7(8), e42225. <https://doi.org/10.1371/journal.pone.0042225>

711 Joshi, J., Karanth, P. K., & Edgecombe, G. D. (2020). The out-of-India hypothesis:  
712 Evidence from an ancient centipede genus, *Rhysida* (Chilopoda: Scolopendromorpha)  
713 from the Oriental Region, and systematics of Indian species. *Zoological Journal of the*  
714 *Linnean Society*, 189(3), 828–861. <https://doi.org/10.1093/zoolinnean/zlz138>

715 Kimura, M. (1983). *The neutral theory of molecular evolution*. Cambridge University  
716 Press. <https://doi.org/10.1017/CBO9780511623486>

717 Larsson, A. (2014). AliView: A fast and lightweight alignment viewer and editor for large  
718 datasets. *Bioinformatics (Oxford, England)*, 30(22), 3276–3278.  
719 <https://doi.org/10.1093/bioinformatics/btu531>

720 Lawrence, E. R., & Fraser, D. J. (2020). Latitudinal biodiversity gradients at three levels:  
721 Linking species richness, population richness and genetic diversity. *Global Ecology and*  
722 *Biogeography*, 29(5), 770–788. <https://doi.org/10.1111/geb.13075>

723 Leffler, E. M., Bullaughey, K., Matute, D. R., Meyer, W. K., Ségurel, L., Venkat, A.,  
724 Andolfatto, P., & Przeworski, M. (2012). Revisiting an old riddle: what determines  
725 genetic diversity levels within species? *PLOS Biology*, 10(9), e1001388.  
726 <https://doi.org/10.1371/journal.pbio.1001388>

727 Leigh, D. M., van Rees, C. B., Millette, K. L., Breed, M. F., Schmidt, C., Bertola, L. D.,  
728 Hand, B. K., Hunter, M. E., Jensen, E. L., Kershaw, F., Liggins, L., Luikart, G., Manel,  
729 S., Mergeay, J., Miller, J. M., Segelbacher, G., Hoban, S., & Paz-Vinas, I. (2021).  
730 Opportunities and challenges of macrogenetic studies. *Nature Reviews Genetics*, 1–17.  
731 <https://doi.org/10.1038/s41576-021-00394-0>

732 Lewis, J. G. E. (1981). *The Biology of Centipedes*. Cambridge University Press.  
733 <https://doi.org/10.1017/CBO9780511565649>

734 Nei, M., & Tajima, F. (1981). DNA polymorphism detectable by restriction  
735 endonucleases. *Genetics*, 97(1), 145–163. <https://doi.org/10.1093/genetics/97.1.145>

736 Mackintosh, A., Laetsch, D. R., Hayward, A., Charlesworth, B., Waterfall, M., Vila, R., &  
737 Lohse, K. (2019). The determinants of genetic diversity in butterflies. *Nature*  
738 *Communications*, 10(1), 3466. <https://doi.org/10.1038/s41467-019-11308-4>

739 Manel, S., Guerin, P.-E., Mouillot, D., Blanchet, S., Vélez, L., Albouy, C., & Pellissier, L.  
740 (2020). Global determinants of freshwater and marine fish genetic diversity. *Nature*  
741 *Communications*, 11(1), 692. <https://doi.org/10.1038/s41467-020-14409-7>

742 Millette, K. L., Fugère, V., Debysier, C., Greiner, A., Chain, F. J. J., & Gonzalez, A.

743 (2020). No consistent effects of humans on animal genetic diversity worldwide. *Ecology*  
744 *Letters*, 23(1), 55–67. <https://doi.org/10.1111/ele.13394>

745 Miraldo, A., Li, S., Borregaard, M. K., Flórez-Rodríguez, A., Gopalakrishnan, S.,  
746 Rizvanovic, M., Wang, Z., Rahbek, C., Marske, K. A., & Nogués-Bravo, D. (2016). An  
747 Anthropocene map of genetic diversity. *Science*, 353(6307), 1532–1535.  
748 <https://doi.org/10.1126/science.aaf4381>

749 Mittelbach, G. G., Schemske, D. W., Cornell, H. V., Allen, A. P., Brown, J. M., Bush, M.  
750 B., Harrison, S. P., Hurlbert, A. H., Knowlton, N., Lessios, H. A., McCain, C. M.,  
751 McCune, A. R., McDade, L. A., McPeck, M. A., Near, T. J., Price, T. D., Ricklefs, R. E.,  
752 Roy, K., Sax, D. F., ... Turelli, M. (2007). Evolution and the latitudinal diversity gradient:  
753 Speciation, extinction and biogeography. *Ecology Letters*, 10(4), 315–331.  
754 <https://doi.org/10.1111/j.1461-0248.2007.01020.x>

755 Muriene, J., Edgecombe, G., & Giribet, G. (2011). Comparative phylogeography of the  
756 centipedes *Cryptops pictus* and *C. niuensis* (Chilopoda) in New Caledonia, Fiji and  
757 Vanuatu. *Organisms, Diversity & Evolution*, 11, 61–74. [https://doi.org/10.1007/s13127-](https://doi.org/10.1007/s13127-011-0041-7)  
758 [011-0041-7](https://doi.org/10.1007/s13127-011-0041-7)

759 Nabholz, B., Glémin, S., & Galtier, N. (2009). The erratic mitochondrial clock: Variations  
760 of mutation rate, not population size, affect mtDNA diversity across birds and mammals.  
761 *BMC Evolutionary Biology*, 9(1), 54. <https://doi.org/10.1186/1471-2148-9-54>

762 Nei, M., & Tajima, F. (1981). DNA polymorphism detectable by restriction  
763 endonucleases. *Genetics*, 97(1), 145–163. <https://doi.org/10.1093/genetics/97.1.145>

764 Oeyen, J. P., Funke, S., Böhme, W., & Wesener, T. (2014). The evolutionary history of  
765 the rediscovered austrian population of the giant centipede *Scolopendra cingulata*

766 Latreille 1829 (Chilopoda, Scolopendromorpha). PLOS ONE, 9(9), e108650.  
767 <https://doi.org/10.1371/journal.pone.0108650>

768 Padgham, M., & Sumner, M. D. (2021). geodist: Fast, dependency-free geodesic  
769 distance calculations. R package version 0.0.7. [https://CRAN.R-](https://CRAN.R-project.org/package=geodist)  
770 [project.org/package=geodist](https://CRAN.R-project.org/package=geodist)

771 Pagel, M. (1999). Inferring the historical patterns of biological evolution. Nature,  
772 401(6756), 877–884. <https://doi.org/10.1038/44766>

773 Papadopoulou, A., Anastasiou, I., Spagopoulou, F., Stalimerou, M., Terzopoulou, S.,  
774 Legakis, A., & Vogler, A. P. (2011). Testing the species–genetic diversity correlation in  
775 the Aegean archipelago: Toward a haplotype-based macroecology? The American  
776 Naturalist, 178(2), 241–255. <https://doi.org/10.1086/660828>

777 Paradis, E. (2010). pegas: An R package for population genetics with an integrated–  
778 modular approach. Bioinformatics, 26(3), 419–420.  
779 <https://doi.org/10.1093/bioinformatics/btp696>

780 Paradis, E., & Schliep, K. (2019). ape 5.0: An environment for modern phylogenetics  
781 and evolutionary analyses in R. Bioinformatics, 35(3), 526–528.  
782 <https://doi.org/10.1093/bioinformatics/bty633>

783 Paz, A., Ibáñez, R., Lips, K. R., & Crawford, A. J. (2015). Testing the role of ecology  
784 and life history in structuring genetic variation across a landscape: A trait-based  
785 phylogeographic approach. Molecular Ecology, 24(14), 3723–3737.  
786 <https://doi.org/10.1111/mec.13275>

787 Paz-Vinas, I., Jensen, E. L., Bertola, L. D., Breed, M. F., Hand, B. K., Hunter, M. E.,  
788 Kershaw, F., Leigh, D. M., Luikart, G., Mergeay, J., Miller, J. M., Van Rees, C. B.,

789 Segelbacher, G., & Hoban, S. (2021). Macrogenetic studies must not ignore limitations  
790 of genetic markers and scale. *Ecology Letters*, 24(6), 1282–1284.  
791 <https://doi.org/10.1111/ele.13732>

792 Piganeau, G., & Eyre-Walker, A. (2009). Evidence for variation in the effective  
793 population size of animal mitochondrial DNA. *PLOS ONE*, 4(2), e4396.  
794 <https://doi.org/10.1371/journal.pone.0004396>

795 R Core Team (2021). R: A language and environment for statistical computing. R  
796 Foundation.

797 Raffard, A., Santoul, F., Cucherousset, J., & Blanchet, S. (2019). The community and  
798 ecosystem consequences of intraspecific diversity: A meta-analysis. *Biological Reviews*,  
799 94(2), 648–661. <https://doi.org/10.1111/brv.12472>

800 Revell, L. J. (2012). phytools: An R package for phylogenetic comparative biology (and  
801 other things). *Methods in Ecology and Evolution*, 3(2), 217–223.  
802 <https://doi.org/10.1111/j.2041-210X.2011.00169.x>

803 Romiguier, J., Gayral, P., Ballenghien, M., Bernard, A., Cahais, V., Chenuil, A., Chiari,  
804 Y., Dernas, R., Duret, L., Faivre, N., Loire, E., Lourenco, J. M., Nabholz, B., Roux, C.,  
805 Tsagkogeorga, G., Weber, A. a.-T., Weinert, L. A., Belkhir, K., Bierne, N., ... Galtier, N.  
806 (2014). Comparative population genomics in animals uncovers the determinants of  
807 genetic diversity. *Nature*, 515(7526), 261–263. <https://doi.org/10.1038/nature13685>

808 Salinas-Ivanenko, S., & Múrria, C. (2021). Macroecological trend of increasing values of  
809 intraspecific genetic diversity and population structure from temperate to tropical  
810 streams. *Global Ecology and Biogeography*, 30(8), 1685–1697.  
811 <https://doi.org/10.1111/geb.13344>

- 812 Shelley, R., Edwards, G., & Chagas-Jr, A. (2005). Introduction of the centipede  
813 *Scolopendra morsitans* L., 1758, into northeastern Florida, the first authentic North  
814 American record, and a review of its global occurrences (Scolopendromorpha:  
815 Scolopendridae: Scolopendrinae). *Entomological News*, 116, 39–58.
- 816 Sheth, S. N., Morueta-Holme, N., & Angert, A. L. (2020). Determinants of geographic  
817 range size in plants. *New Phytologist*, 226(3), 650–665.  
818 <https://doi.org/10.1111/nph.16406>
- 819 Simaiakis, S. M., Dimopoulou, A., Mitrakos, A., Mylonas, M., & Parmakelis, A. (2012).  
820 The evolutionary history of the Mediterranean centipede *Scolopendra cingulata*  
821 (Latreille, 1829) (Chilopoda: Scolopendridae) across the Aegean archipelago. *Biological*  
822 *Journal of the Linnean Society*, 105(3), 507–521. [https://doi.org/10.1111/j.1095-](https://doi.org/10.1111/j.1095-8312.2011.01813.x)  
823 [8312.2011.01813.x](https://doi.org/10.1111/j.1095-8312.2011.01813.x)
- 824 Siriwut, W., Edgecombe, G., Sutcharit, C., Tongkerd, P., & Panha, S. (2018).  
825 Systematic revision and phylogenetic reassessment of the centipede genera *Rhysida*  
826 Wood, 1862 and *Alluropus* Silvestri, 1911 (Chilopoda: Scolopendromorpha) in  
827 Southeast Asia, with further discussion of the subfamily Otostigminae. *Invertebrate*  
828 *Systematics*, 32, 1005–1049.
- 829 Smithson, M., & Verkuilen, J. (2006). A better lemon squeezer? Maximum-likelihood  
830 regression with beta-distributed dependent variables. *Psychological Methods*, 11(1),  
831 54–71. <https://doi.org/10.1037/1082-989X.11.1.54>
- 832 Spelda, J., Reip, H., Oliveira-Biener, U., & Melzer, R. (2011). Barcoding Fauna  
833 Bavarica: Myriapoda A contribution to DNA sequence-based identifications of  
834 centipedes and millipedes (Chilopoda, Diplopoda). *ZooKeys*, 156, 123–139.

835 <https://doi.org/10.3897/zookeys.156.2176>

836 Tennekes, M. (2018). tmap: Thematic maps in R. *Journal of Statistical Software*, 84, 1–  
837 39. <https://doi.org/10.18637/jss.v084.i06>

838 Thakur, M. P., Phillips, H. R. P., Brose, U., De Vries, F. T., Lavelle, P., Loreau, M.,  
839 Mathieu, J., Mulder, C., Van der Putten, W. H., Rillig, M. C., Wardle, D. A., Bach, E. M.,  
840 Bartz, M. L. C., Bennett, J. M., Briones, M. J. I., Brown, G., Decaëns, T., Eisenhauer,  
841 N., Ferlian, O., ... Cameron, E. K. (2020). Towards an integrative understanding of soil  
842 biodiversity. *Biological Reviews*, 95(2), 350–364. <https://doi.org/10.1111/brv.12567>  
843 Theodoridis, S., Fordham, D. A., Brown, S. C., Li, S., Rahbek, C., & Nogues-Bravo, D.  
844 (2020). Evolutionary history and past climate change shape the distribution of genetic  
845 diversity in terrestrial mammals. *Nature Communications*, 11(1).  
846 <https://doi.org/10.1038/s41467-020-16449-5>

847 Vahtera, V., Edgecombe, G. D., & Giribet, G. (2012). Evolution of blindness in  
848 scolopendromorph centipedes (Chilopoda: Scolopendromorpha): insight from an  
849 expanded sampling of molecular data. *Cladistics*, 28(1), 4–20.  
850 <https://doi.org/10.1111/j.1096-0031.2011.00361.x>

851 Vélez, S., Mesibov, R., & Giribet, G. (2012). Biogeography in a Continental Island:  
852 Population Structure of the Relict Endemic Centipede *Craterostigma tasmanianus*  
853 (Chilopoda, Craterostigmomorpha) in Tasmania Using 16S rRNA and COI. *Journal of*  
854 *Heredity*, 103(1), 80–91. <https://doi.org/10.1093/jhered/esr110>

855 Vellend, M., & Geber, M. A. (2005). Connections between species diversity and genetic  
856 diversity. *Ecology Letters*, 8(7), 767–781. [https://doi.org/10.1111/j.1461-](https://doi.org/10.1111/j.1461-0248.2005.00775.x)  
857 [0248.2005.00775.x](https://doi.org/10.1111/j.1461-0248.2005.00775.x)

858 Wesener, T., Voigtländer, K., Decker, P., Oeyen, J. P., & Spelda, J. (2016). Barcoding  
859 of Central European *Cryptops* centipedes reveals large interspecific distances with  
860 ghost lineages and new species records from Germany and Austria (Chilopoda,  
861 Scolopendromorpha). *ZooKeys*, 564, 21–46. <https://doi.org/10.3897/zookeys.564.7535>  
862 Wesener, T., Voigtländer, K., Decker, P., Oeyen, J. P., Spelda, J., & Lindner, N. (2015).  
863 First results of the German Barcode of Life (GBOL) – Myriapoda project: Cryptic  
864 lineages in German *Stenotaenia linearis* (Koch, 1835) (Chilopoda, Geophilomorpha).  
865 *ZooKeys*, 510, 15–29. <https://doi.org/10.3897/zookeys.510.8852>  
866 White, E. P., Ernest, S. K. M., Kerkhoff, A. J., & Enquist, B. J. (2007). Relationships  
867 between body size and abundance in ecology. *Trends in Ecology & Evolution*, 22(6),  
868 323–330. <https://doi.org/10.1016/j.tree.2007.03.007>  
869 Winter, D. J. (2017). rentrez: An R package for the NCBI eUtils API. *The R Journal*,  
870 9(2), 520–526.  
871



872 **Tables and Figures**

873 **Table 1.** Parameter estimates from the best performing beta regression model defined

874 as follows -

875 Genetic diversity<sub>*i*</sub> ~ Beta( $\mu_i$ ,  $\square_i$ )

876  $\text{logit}(\mu_i) = \text{Body size}_i + \text{Vision}_i + \text{Maternal care}_i + \text{Mean latitude}_i + \text{Latitudinal range}_i +$

877  $\text{Average geographic distance}_i$

878  $\square_i \sim \text{Number of sequences}_i$

| Parameters                    | Estimate             | 95% Confidence interval | z value |
|-------------------------------|----------------------|-------------------------|---------|
| <b>Mean</b>                   |                      |                         |         |
| <b>Intercept</b>              | -2.949***<br>(0.247) | -3.433– -2.466          | -11.959 |
| <b>Body size</b>              | -0.230**<br>(0.078)  | -0.383 – -0.077         | -2.949  |
| <b>Vision: Present</b>        | 0.131<br>(0.176)     | -0.214 – 0.476          | 0.743   |
| <b>Maternal care: Present</b> | 0.496**<br>(0.191)   | 0.122 – 0.870           | 2.601   |
| <b>Mean latitude</b>          | -0.211**<br>(0.066)  | -0.340 – -0.082         | -3.213  |
| <b>Latitudinal range</b>      | 0.072<br>(0.070)     | -0.066 – 0.210          | 1.024   |

|                                    |                     |               |                                                  |
|------------------------------------|---------------------|---------------|--------------------------------------------------|
| <b>Average geographic distance</b> | 0.134*<br>(0.062)   | 0.013 – 0.255 | 2.167                                            |
| <b>Precision</b>                   |                     |               |                                                  |
| <b>Intercept</b>                   | 3.271***<br>(0.133) | 3.010 – 3.531 | 24.633                                           |
| <b>Number of sequences</b>         | 0.250*<br>(0.125)   | 0.005 – 0.495 | 1.998                                            |
| <b>Pseudo R-squared</b>            |                     |               | 0.2151                                           |
| <b>Log-likelihood</b>              |                     |               | 213.7                                            |
| <b>AIC</b>                         |                     |               | -409.4421                                        |
| <b>N</b>                           |                     |               | 120                                              |
| <b>Significance</b>                |                     |               | *** = p < 0.001<br>** = p < 0.01<br>* = p < 0.05 |

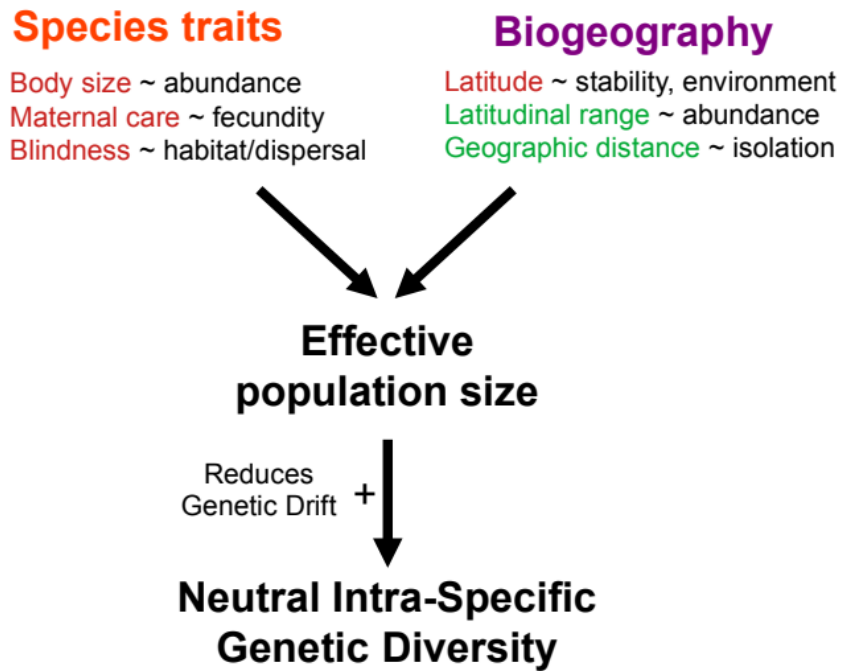

879

880 **Figure 1.** Schematic figure representing the theoretical drivers of intra-specific genetic  
881 diversity. Species traits and biogeography associated with species can influence their  
882 effective population size, which has a positive relationship with neutral genetic diversity.  
883 Variables with a negative influence on effective population size are highlighted in red  
884 and those with a positive influence in green.

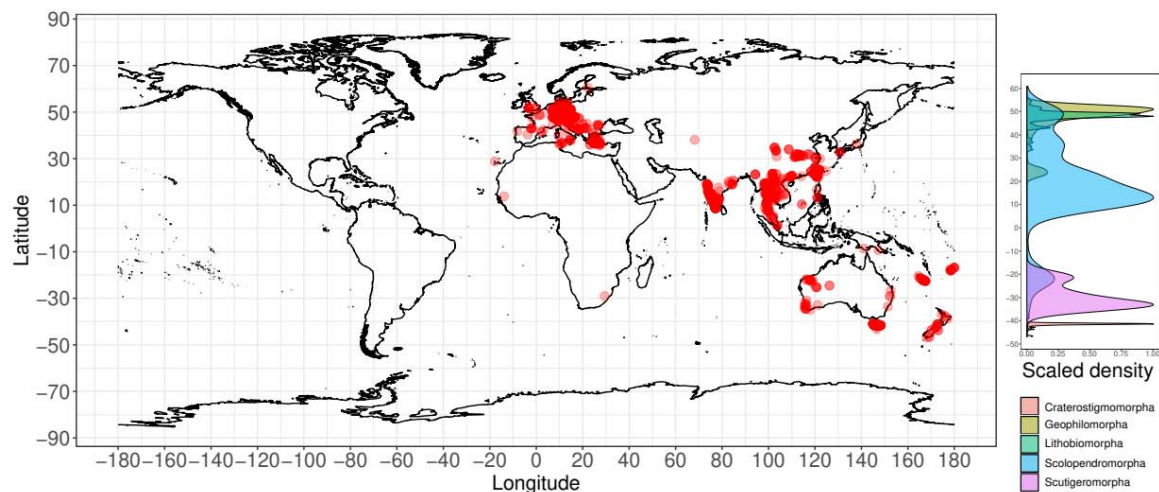

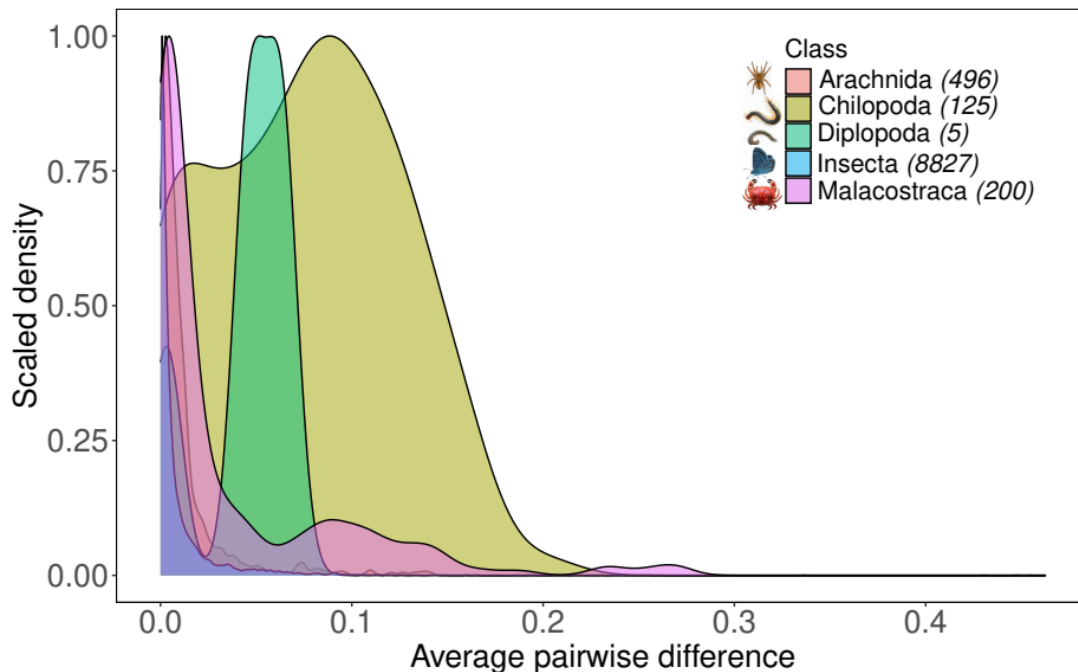

890

891 **Figure 3.** Distribution of mitochondrial COI genetic diversity (average pairwise  
892 differences) across arthropod groups. The values arise from the smoothed density of  
893 counts, scaled to a maximum of 1 for each taxonomic class. In the legend, the numbers  
894 in parentheses are the number of individual data points used for the taxonomic class.  
895 Data and their source references are provided in Appendix S4 in Supporting  
896 Information.

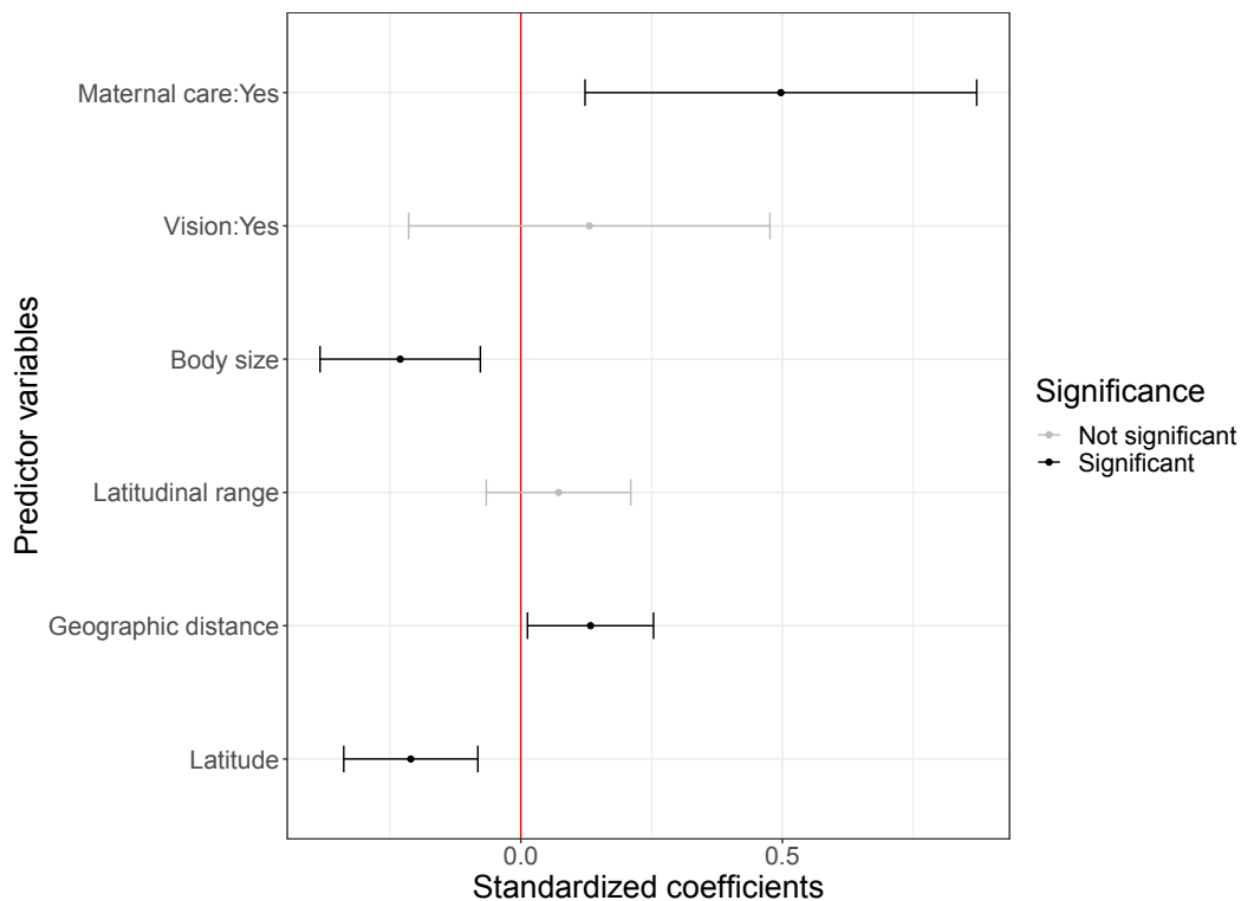

897

898

899 **Figure 4.** Standardized coefficient estimates (logit-scale) from the beta regression

900 model with the lowest AIC value specified as -

901 *Genetic Diversity ~ Body size + Vision + Maternal care + Mean latitude + Latitudinal*

902 *range + Geographic distance | Number of sequences*

903 Mean coefficient estimates are represented as points and their 95% confidence

904 intervals are displayed as error bars for each predictor variable. Positive values indicate

905 a positive relationship between the corresponding predictor variable and genetic

906 diversity and the converse.

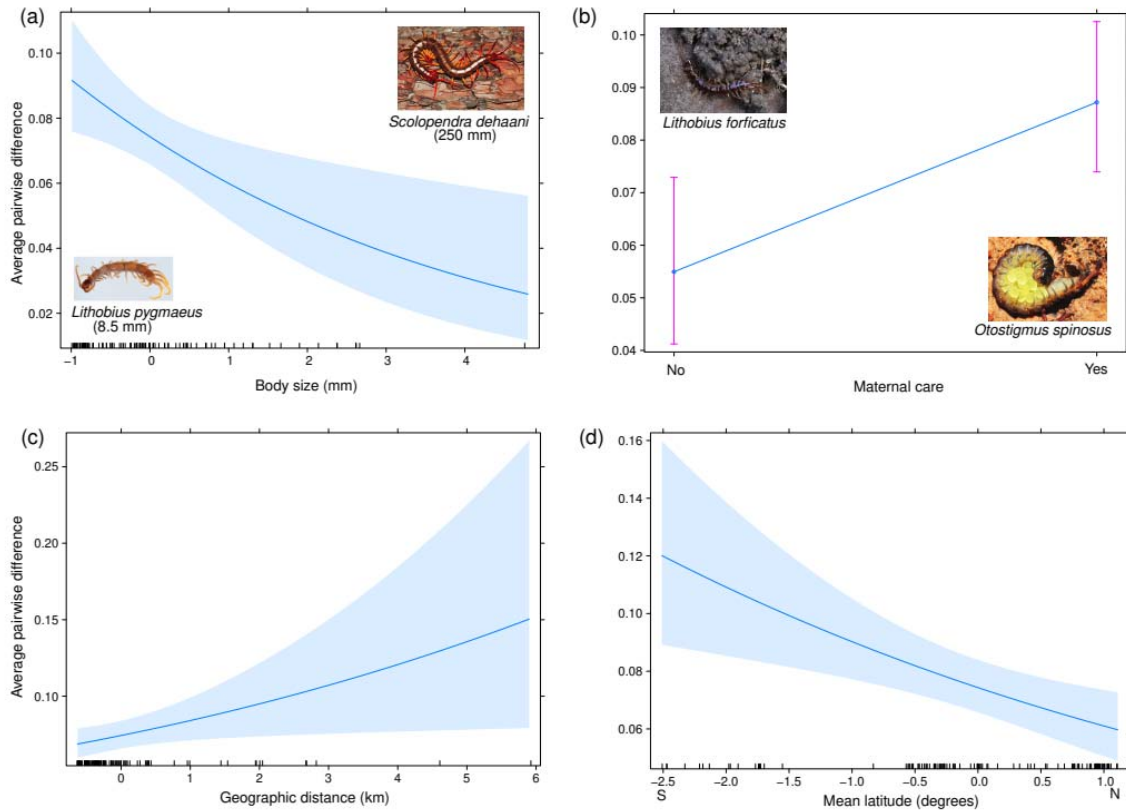

907

908 **Figure 5.** Fitted relationships between the significant explanatory variables and genetic  
909 diversity (measured as average pairwise difference) from the beta regression model in  
910 the scale of observed values. 95% confidence intervals are represented by the shaded  
911 band around the fitted line for continuous variables and error bars for the categorical  
912 variables. The effect of each predicted variable is calculated by varying it across the  
913 observed range, while keeping other predictor variables at their mean values.

914 **Data Accessibility Statement**

915

916 The raw data used for analysis are provided in Appendices S1-S3. R scripts for data  
917 analysis will be made available at the corresponding author's github profile on  
918 publication.

919

920 **Supporting Information**

921

922 **Appendix S1:** Mitochondrial COI accession numbers and associated location  
923 coordinates used for data analysis

924 **Appendix S2:** Centipede species traits and biogeographic variables used for data  
925 analysis

926 **Appendix S3:** Summary statistics of genetic diversity, sequence data and species traits  
927 across centipede species

928 **Appendix S4:** Genetic diversity estimates for arthropod classes

929 **Appendix S5:** Beta regression analysis results using a dataset that includes records  
930 corresponding to synanthropic introductions



931 **Acknowledgements**

932

933 D. K. Bharti was supported during this study by a IndiaAlliance DBT Wellcome grant  
934 (IAI/20/1/504919) to Jahnavi Joshi. Pooja Yashwant Pawar was supported by a start-up  
935 grant from CSIR-Centre for Cellular and Molecular Biology, Hyderabad to Jahnavi Joshi.  
936 We thank Dr. Nesrine Akkari, Prof. Zoltán Korsós and Prof. Pavel Stoev for help with  
937 centipede size and distribution data. We thank Dr. Rohit Naniwadekar for input regarding  
938 statistical analysis, and members of the Evol-Ecology lab at CSIR-Centre for Cellular  
939 and Molecular Biology, Hyderabad for suggestions that helped in improving the  
940 manuscript.

941

942 **Statement of authorship**

943

944 DKB and JJ conceptualized this work with support from GE and PYP. All authors  
945 contributed equally to data curation. DKB carried out the methodology, formal analysis  
946 and visualization with support from JJ, GE and PYP. DKB wrote the first draft of the  
947 manuscript with support from JJ, GE and PYP, and all the authors reviewed and edited  
948 the manuscript. JJ acquired the funding for this study.

949

950 **Conflict of interest statement**

951

952 The authors declare no conflict of interest.
